# Supplementary material
Source: Springer Nature journal article supplement (https://www.springermedizin.de/resource/supplementary/12950_2012_255_MOESM2_ESM.pdf/9558318)

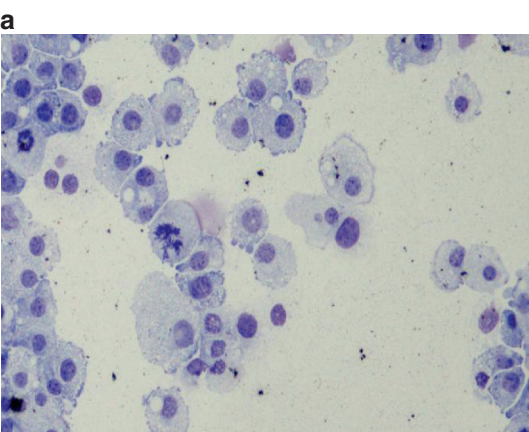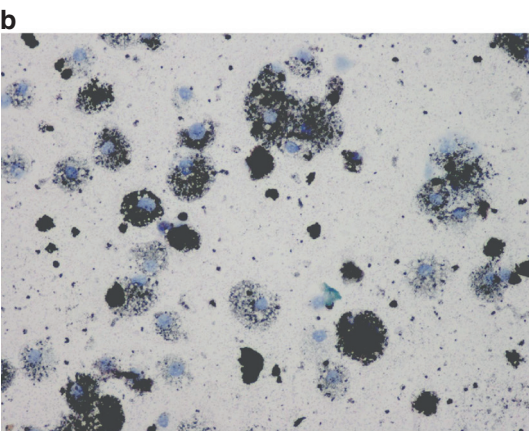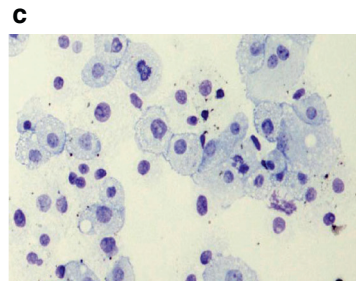

*day 1*

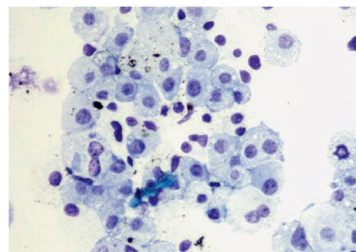

*day 2*

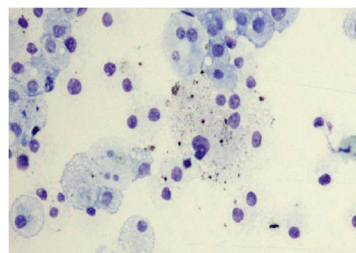

*day 3*

Supplement: MOESM2 [file 9558318]
